# Supplementary material for: Aorto-Iliac Artery Calcification and Graft Outcomes in Kidney Transplant Recipients
Source: PubMed Central journal article supplement (PMC7829792; doi:10.3390/jcm10020325), 2021-01-17
Supplement: jcm-10-00325-s001.pdf [file jcm-10-00325-s001.pdf]

# Aorto-Iliac Artery Calcification and Graft Outcomes in Kidney Transplant Recipients

## Supplementary Material

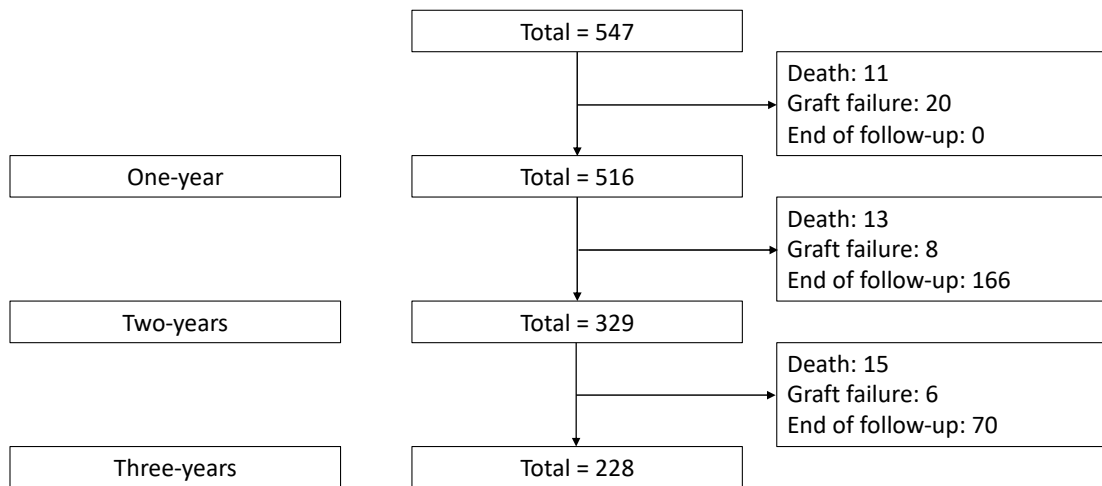

**Figure S1.** Flowchart for death, graft failure and end of follow-up in the first three years after kidney transplantation.

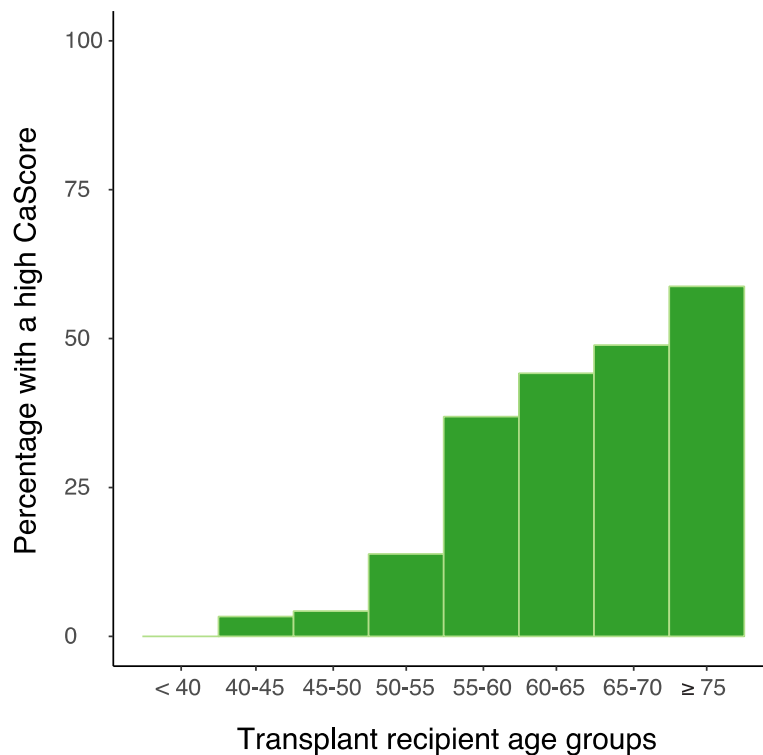

**Figure S2.** Distribution of patients with a high CaScore for eight age groups.

Death-censored graft failure

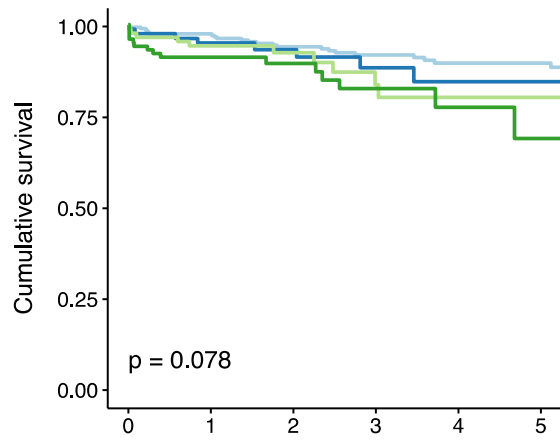

Overall graft failure

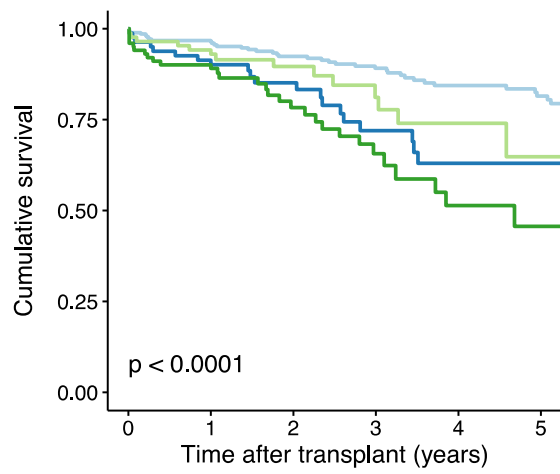

No. at risk

|                          |     |     |     |     |     |    |
|--------------------------|-----|-----|-----|-----|-----|----|
| < 65 – low CaScore       | 279 | 270 | 193 | 150 | 104 | 82 |
| < 65 – high CaScore      | 81  | 74  | 48  | 30  | 19  | 13 |
| $\geq 65$ – low CaScore  | 86  | 81  | 43  | 24  | 13  | 7  |
| $\geq 65$ – high CaScore | 101 | 91  | 45  | 24  | 12  | 7  |

**Figure S3.** Kaplan-Meier survival curve for death-censored graft failure and overall graft failure free-survival for the low and high aorto-iliac CaScore group, stratified by transplant recipient age (< 65 or  $\geq 65$  years-of-age), including a life table applicable for both graphs. Number at risk (No. at risk) provided for all four groups.

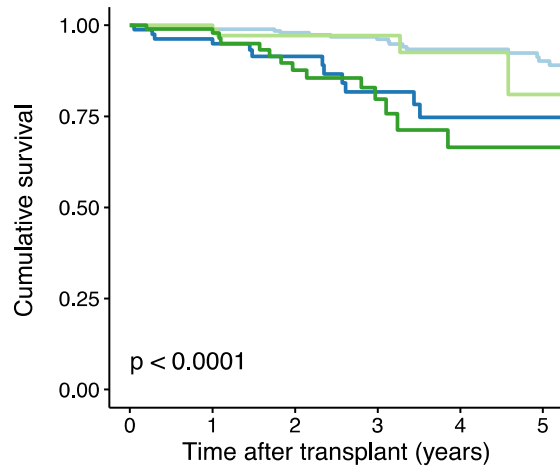

No. at risk

|                     |     |     |     |     |     |    |
|---------------------|-----|-----|-----|-----|-----|----|
| < 65 – low CaScore  | 279 | 270 | 193 | 150 | 104 | 82 |
| < 65 – high CaScore | 81  | 74  | 48  | 30  | 19  | 13 |
| ≥ 65 – low CaScore  | 86  | 81  | 43  | 24  | 13  | 7  |
| ≥ 65 – high CaScore | 101 | 91  | 45  | 24  | 12  | 7  |

**Figure S4.** Kaplan-Meier survival curve for death with a functioning graft free-survival for the low and high aorto-iliac CaScore group stratified by transplant recipient age (< 65 or ≥ 65 years-of-age). Number at risk (No. at risk) provided for all four groups.

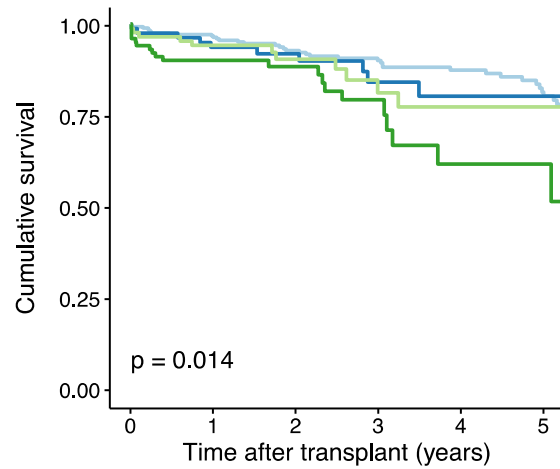

No. at risk

|                     |     |     |     |     |     |    |
|---------------------|-----|-----|-----|-----|-----|----|
| < 65 – low CaScore  | 279 | 267 | 190 | 148 | 103 | 76 |
| < 65 – high CaScore | 81  | 72  | 48  | 29  | 19  | 13 |
| ≥ 65 – low CaScore  | 86  | 81  | 42  | 23  | 13  | 7  |
| ≥ 65 – high CaScore | 101 | 89  | 45  | 23  | 10  | 6  |

**Figure 5.** Kaplan-Meier survival curve for graft function decline free-survival for the low and high aorto-iliac CaScore group stratified by transplant recipient age (< 65 or ≥ 65 years-of-age). Number at risk (No. at risk) provided for all four groups.

**Table S1.** Characteristics stratified by donor status.

| <b>Variables</b>                                      | <b>Living-donation<br/>(n = 301)</b> | <b>Deceased-donation<br/>(n = 246)</b> | <b>p-value</b>            |
|-------------------------------------------------------|--------------------------------------|----------------------------------------|---------------------------|
| <b>Patient</b>                                        |                                      |                                        |                           |
| Male gender, <i>n (%)</i> <sup>a</sup>                | 187 (62.1)                           | 149 (39.4)                             | 0.776 <sup>b</sup>        |
| Age, <i>years</i> <sup>c</sup>                        | 58 [51, 65]                          | 64 [51, 70]                            | <0.001 <sup>d</sup>       |
| Diabetes mellitus, <i>n (%)</i> <sup>a</sup>          | 68 (22.6)                            | 105 (42.7)                             | <0.001 <sup>b</sup>       |
| Body Mass Index, <i>kg/m<sup>2</sup></i> <sup>b</sup> | 26.7 (4.7)                           | 27.0 (4.7)                             | 0.457 <sup>c</sup>        |
| Smoker, <i>n (%)</i> <sup>a</sup>                     |                                      |                                        | 0.343 <sup>b</sup>        |
| Non                                                   | 79 (26.2)                            | 75 (30.5)                              |                           |
| Former                                                | 191 (63.5)                           | 141 (57.3)                             |                           |
| Current                                               | 31 (10.3)                            | 30 (12.2)                              |                           |
| Hypercholesterolemia, <i>n (%)</i> <sup>a</sup>       | 86 (28.6)                            | 67 (27.2)                              | 0.802 <sup>b</sup>        |
| Total cholesterol, <i>mmol/L</i>                      | 4.6 (1.2)                            | 4.8 (1.4)                              | 0.240 <sup>c</sup>        |
| Systolic blood pressure, <i>mmHg</i>                  | 145 (20.)                            | 145 (25)                               | 0.850 <sup>c</sup>        |
| Use of antihypertensive medication, <i>n (%)</i>      | 233 (77.4)                           | 206 (83.7)                             | 0.081 <sup>b</sup>        |
| Dialysis vintage, <i>months</i> <sup>c</sup>          | 0 [0, 14]                            | 25 [13, 43]                            | <0.001 <sup>d</sup>       |
| Previous transplants, <i>n (%)</i> <sup>a</sup>       |                                      |                                        | 0.426 <sup>b</sup>        |
| Non                                                   | 284 (94.4)                           | 230 (93.5)                             |                           |
| One                                                   | 13 (4.3)                             | 9 (3.7)                                |                           |
| Two                                                   | 4 (1.3)                              | 7 (2.8)                                |                           |
| Aorto-iliac CaScore, <i>HU</i>                        | 2163 [209, 6331]                     | 4037 [505, 8616]                       | <b>0.006</b> <sup>d</sup> |
| <b>Transplantation</b>                                |                                      |                                        |                           |
| Male gender donor, <i>n (%)</i>                       | 146 (48.5)                           | 148 (60.2)                             | <b>0.008</b> <sup>b</sup> |
| Donor age, <i>years</i>                               | 54 (12)                              | 54 (16)                                | 0.571 <sup>c</sup>        |
| No. of HLA-mismatches, <i>n</i>                       | 3.6 (1.5)                            | 3.3 (1.5)                              | <b>0.013</b> <sup>c</sup> |
| Warm ischemia time, <i>minutes</i>                    | 40 (21)                              | 43 (49)                                | 0.348 <sup>c</sup>        |
| Cold ischemia time, <i>minutes</i>                    | 169 (64)                             | 756 (248)                              | <0.001 <sup>c</sup>       |
| <b>Follow-up</b> <sup>e</sup>                         |                                      |                                        |                           |
| eGFR at six-months <sup>a</sup>                       | 51 (17)                              | 48 (20)                                | <b>0.037</b> <sup>c</sup> |
| eGFR at one-year <sup>a</sup>                         | 54 (18)                              | 47 (23)                                | <0.001 <sup>c</sup>       |
| Haemoglobin at one-year, <i>mmol/L</i>                | 8.2 (1.1)                            | 8.0 (1.0)                              | 0.076 <sup>c</sup>        |
| Calcium at one-year, <i>mmol/L</i>                    | 2.44 (0.13)                          | 2.43 (0.15)                            | 0.458 <sup>c</sup>        |
| Phosphate at one year, <i>mmol/L</i>                  | 0.93 (0.21)                          | 0.93 (0.21)                            | 0.652 <sup>c</sup>        |
| Albumin at one-year, <i>g/L</i>                       | 44 (3)                               | 43 (3)                                 | <0.001 <sup>c</sup>       |
| Glucose at one-year, <i>mmol/L</i>                    | 5.7 [5.1, 6.9]                       | 6.1 [5.2, 8.3]                         | <b>0.004</b> <sup>d</sup> |
| PTH at one-year, <i>pmol/L</i>                        | 9 [7, 14]                            | 12 [9, 17]                             | <0.001 <sup>d</sup>       |
| Protein excretion at one-year, <i>g/24h</i>           | 0.2 [0.1, 0.2]                       | 0.2 [0.1, 0.3]                         | <b>0.045</b> <sup>d</sup> |
| Cytomegalovirus infection, <i>n (%)</i>               | 7 (2.3)                              | 22 (8.9)                               | <0.001 <sup>b</sup>       |

HU = Hounsfield units; HLA = human leukocyte antigen; eGFR = estimated-Glomerular Filtration Rate; PTH = parathyroid hormone; <sup>a</sup> eGFR – CKD-EPI (Chronic Kidney Disease Epidemiology Collaboration) (mL/min per 1.73 m<sup>2</sup>); <sup>b</sup> p-value by chi-square test;

<sup>c</sup> p-value by student-t test; <sup>d</sup> p-value by Mann-Whitney U test; <sup>e</sup> data available for 462 patients

**Table S2.** Multivariable adjusted associations of the CaScore with one-year eGFR after multiple imputation by chained equations.

|                      | <b>Standard <math>\beta</math></b> | <b>95% CI</b> | <b>p-value</b> |
|----------------------|------------------------------------|---------------|----------------|
| <b>One-year eGFR</b> |                                    |               |                |
| Univariate           | -3.3                               | -5.1 to -1.5  | <0.0001        |
| Model 1              | -3.0                               | -4.8 to -1.2  | <0.0001        |
| Model 2              | -3.1                               | -4.9 to -1.3  | <0.0001        |
| Model 3              | -1.5                               | -3.6 to 0.6   | 0.160          |
| Model 4              | -0.7                               | -2.7 to 1.2   | 0.271          |

Linear regression analysis after multiple imputation by chained equations (MICE). Data are presented as hazard ratio and 95% confidence interval (CI) for the continuous CaScore (natural log transformed). Model 1: adjusted for transplant centre and time between computed tomography and transplantation; model 2: adjusted for model 1 plus donor gender, donor type (living donation, DCD or DBD), cold ischemia time, no. of HLA mismatches, recipient gender, diabetes mellitus, smoking, dialysis vintage, no. of previous transplantations, statin use, laboratory results at one year after transplantation (serum phosphate, serum calcium, serum glucose, serum haemoglobin, serum PTH, proteinuria), and episode of acute rejection; model 3: adjusted for model 2 plus recipient age; model 4: adjusted for model 3 plus donor age

**Table 3.** Multivariable adjusted associations of the CaScore with one-year eGFR.

|                      | Living-donation  |              |                  | Deceased-donation |              |              |
|----------------------|------------------|--------------|------------------|-------------------|--------------|--------------|
|                      | Standard $\beta$ | 95% CI       | p-value          | Standard $\beta$  | 95% CI       | p-value      |
| <b>One-year eGFR</b> |                  |              |                  |                   |              |              |
| Univariate           | -1.9             | -4.1 to 0.2  | 0.079            | -4.6              | -7.5 to -1.6 | <b>0.002</b> |
| Model 1              | -2.3             | -4.5 to -0.1 | <b>0.041</b>     | -4.3              | -7.3 to -1.3 | <b>0.005</b> |
| Model 2              | -4.0             | -6.1 to -1.9 | <b>&lt;0.001</b> | -4.6              | -7.7 to -1.5 | <b>0.004</b> |
| Model 3              | -2.1             | -4.5 to 0.2  | 0.070            | -3.7              | -7.2 to -0.1 | <b>0.049</b> |
| Model 4              | -1.6             | -3.9 to 0.6  | 0.149            | -1.9              | -5.3 to 1.6  | 0.287        |

Linear regression analysis, data available for 462 patients in total. Data are presented as hazard ratio and 95% confidence interval (CI) for the continuous CaScore (natural log transformed). Model 1: adjusted for transplant centre and time between computed tomography and transplantation; model 2: adjusted for model 1 plus donor gender, cold ischemia time, no. of HLA mismatches, recipient gender, diabetes mellitus, smoking, dialysis vintage, no. of previous transplantations, statin use, laboratory results at one year after transplantation (serum phosphate, serum calcium, serum glucose, serum haemoglobin, serum PTH, proteinuria), and episode of acute rejection; model 3: adjusted for model 2 plus recipient age; model 4: adjusted for model 3 plus donor age

**Table S4.** Multivariable adjusted associations of the CaScore with (death-censored) graft failure, death with a functioning graft and graft function decline.

|                                       | Living-donation (n = 301) |              |              |              | Deceased-donation (n = 246) |              |              |                  |
|---------------------------------------|---------------------------|--------------|--------------|--------------|-----------------------------|--------------|--------------|------------------|
|                                       | Low CaScore               |              | High CaScore |              | Low CaScore                 |              | High CaScore |                  |
|                                       | Hazard ratio              | Hazard ratio | 95% CI       | p-value      | Hazard ratio                | Hazard ratio | 95% CI       | p-value          |
| <b>Death censored graft failure</b>   |                           |              |              |              |                             |              |              |                  |
| Univariate                            | 1.0 (Ref)                 | 0.8          | 0.3 to 2.3   | 0.639        | 1.0 (Ref)                   | 1.7          | 0.9 to 3.2   | 0.088            |
| Model 1                               | 1.0 (Ref)                 | 0.9          | 0.3 to 2.8   | 0.894        | 1.0 (Ref)                   | 1.7          | 0.9 to 3.1   | 0.096            |
| Model 2                               | 1.0 (Ref)                 | 0.9          | 0.3 to 3.2   | 0.982        | 1.0 (Ref)                   | 1.7          | 0.9 to 3.3   | 0.100            |
| Model 3                               | 1.0 (Ref)                 | 0.8          | 0.2 to 2.7   | 0.740        | 1.0 (Ref)                   | 1.3          | 0.6 to 2.9   | 0.442            |
| Model 4                               | 1.0 (Ref)                 | 0.8          | 0.2 to 2.7   | 0.730        | 1.0 (Ref)                   | 1.3          | 0.6 to 2.7   | 0.458            |
| <b>Overall graft failure</b>          |                           |              |              |              |                             |              |              |                  |
| Univariate                            | 1.0 (Ref)                 | 2.0          | 1.1 to 3.6   | <b>0.020</b> | 1.0 (Ref)                   | 2.6          | 1.6 to 4.2   | <b>&lt;0.001</b> |
| Model 1                               | 1.0 (Ref)                 | 2.2          | 1.2 to 4.0   | <b>0.011</b> | 1.0 (Ref)                   | 2.6          | 1.6 to 4.2   | <b>&lt;0.001</b> |
| Model 2                               | 1.0 (Ref)                 | 2.2          | 1.3 to 4.7   | <b>0.007</b> | 1.0 (Ref)                   | 2.6          | 1.6 to 4.3   | <b>&lt;0.001</b> |
| Model 3                               | 1.0 (Ref)                 | 2.0          | 1.0 to 3.9   | <b>0.047</b> | 1.0 (Ref)                   | 1.8          | 1.0 to 3.2   | <b>0.047</b>     |
| Model 4                               | 1.0 (Ref)                 | 2.0          | 1.1 to 4.2   | <b>0.036</b> | 1.0 (Ref)                   | 1.8          | 1.0 to 3.2   | <b>0.048</b>     |
| <b>Death with a functioning graft</b> |                           |              |              |              |                             |              |              |                  |
| Univariate                            | 1.0 (Ref)                 | 3.2          | 1.5 to 6.5   | <b>0.002</b> | 1.0 (Ref)                   | 4.9          | 2.2 to 11.0  | <b>&lt;0.001</b> |
| Model 1                               | 1.0 (Ref)                 | 3.1          | 1.5 to 6.6   | <b>0.003</b> | 1.0 (Ref)                   | 4.8          | 2.1 to 10.9  | <b>&lt;0.001</b> |
| Model 2                               | 1.0 (Ref)                 | 3.7          | 1.7 to 8.6   | <b>0.002</b> | 1.0 (Ref)                   | 5.0          | 2.1 to 12.0  | <b>&lt;0.001</b> |
| Model 3                               | 1.0 (Ref)                 | 2.9          | 1.2 to 7.0   | <b>0.017</b> | 1.0 (Ref)                   | 4.9          | 1.9 to 12.3  | <b>&lt;0.001</b> |
| Model 4                               | 1.0 (Ref)                 | 3.1          | 1.2 to 7.6   | <b>0.015</b> | 1.0 (Ref)                   | 2.8          | 1.0 to 7.8   | <b>0.042</b>     |
| <b>Graft function decline</b>         |                           |              |              |              |                             |              |              |                  |
| Univariate                            | 1.0 (Ref)                 | 0.9          | 0.4 to 2.1   | 0.825        | 1.0 (Ref)                   | 2.0          | 1.1 to 3.5   | <b>0.021</b>     |
| Model 1                               | 1.0 (Ref)                 | 1.0          | 0.4 to 2.5   | 0.919        | 1.0 (Ref)                   | 2.0          | 1.1 to 3.5   | <b>0.022</b>     |
| Model 2                               | 1.0 (Ref)                 | 1.0          | 0.4 to 2.7   | 0.882        | 1.0 (Ref)                   | 2.1          | 1.1 to 3.9   | <b>0.019</b>     |
| Model 3                               | 1.0 (Ref)                 | 0.8          | 0.3 to 2.2   | 0.792        | 1.0 (Ref)                   | 1.6          | 0.8 to 3.1   | 0.192            |
| Model 4                               | 1.0 (Ref)                 | 0.8          | 0.4 to 2.4   | 0.877        | 1.0 (Ref)                   | 1.6          | 0.9 to 3.5   | 0.132            |

Cox proportional hazards regression analysis. Data are presented as hazard ratio and 95% confidence interval (CI) for the two aorto-iliac CaScore groups (low and high). Model 1: adjusted for transplant centre and time between computed tomography and transplantation; model 2: adjusted for model 1 plus donor gender, cold ischemia time, no. of HLA mismatches, recipient gender, diabetes mellitus, dialysis vintage, and no. of previous transplantations, statin use; model 3: adjusted for model 2 plus recipient age; model 4: adjusted for model 3 plus donor age.
